# Supplementary material
Source: PubMed Central journal article supplement (PMC6016542)
Supplement: NIHMS958448-supplement-2e.pdf [file NIHMS958448-supplement-2e.pdf]

# Commonly Used Reagents

## BUFFERS AND STOCK SOLUTIONS

This collection describes the preparation of buffers and reagents used in the manipulation of proteins (see Table A.2E.1). When preparing solutions, use water purified using a Milli-Q apparatus (Millipore) or equivalent and reagents of the highest grade available. Sterilization—by filtration through a 0.22- $\mu\text{m}$  filter—is recommended for most applications.

CAUTION: *Handle strong acids and bases carefully.*

### **Ammonium acetate, 10 M**

Dissolve 385.4 g ammonium acetate in 150 ml H<sub>2</sub>O  
Add H<sub>2</sub>O to 500 ml

### **Dithiothreitol (DTT), 1 M**

Dissolve 15.45 g DTT in 100 ml H<sub>2</sub>O  
Store at  $-20^{\circ}\text{C}$

### **EDTA (ethylenediamine tetraacetic acid), 0.5 M (pH 8.0)**

Dissolve 186.1 g Na<sub>2</sub>EDTA·2H<sub>2</sub>O in 700 ml H<sub>2</sub>O  
Adjust pH to 8.0 with 10 M NaOH (~50 ml)  
Add H<sub>2</sub>O to 1 liter

*Begin titrating before the sample is completely dissolved. EDTA, even in the disodium salt form, is difficult to dissolve at this concentration unless the pH is increased to between 7 and 8.*

### **Ethidium bromide, 10 mg/ml**

Dissolve 0.2 g ethidium bromide in 20 ml H<sub>2</sub>O  
Mix well and store at  $4^{\circ}\text{C}$  in dark

CAUTION: *Ethidium bromide is a mutagen and must be handled carefully.*

**Table A.2E.1** Molarities and Specific Gravities of Concentrated Acids and Bases

| Acid/base             | Molecular weight | % by weight | Molarity (approx.) | 1 M solution (ml/liter) | Specific gravity |
|-----------------------|------------------|-------------|--------------------|-------------------------|------------------|
| <i>Acids</i>          |                  |             |                    |                         |                  |
| Acetic acid (glacial) | 60.05            | 99.6        | 17.4               | 57.5                    | 1.05             |
| Formic acid           | 46.03            | 90          | 23.6               | 42.4                    | 1.205            |
|                       |                  | 98          | 25.9               | 38.5                    | 1.22             |
| Hydrochloric acid     | 36.46            | 36          | 11.6               | 85.9                    | 1.18             |
| Nitric acid           | 63.01            | 70          | 15.7               | 63.7                    | 1.42             |
| Perchloric acid       | 100.46           | 60          | 9.2                | 108.8                   | 1.54             |
|                       |                  | 72          | 12.2               | 82.1                    | 1.70             |
| Phosphoric acid       | 98.00            | 85          | 14.7               | 67.8                    | 1.70             |
| Sulfuric acid         | 98.07            | 98          | 18.3               | 54.5                    | 1.835            |
| <i>Bases</i>          |                  |             |                    |                         |                  |
| Ammonium hydroxide    | 35.0             | 28          | 14.8               | 67.6                    | 0.90             |
| Potassium hydroxide   | 56.11            | 45          | 11.6               | 82.2                    | 1.447            |
| Potassium hydroxide   | 56.11            | 50          | 13.4               | 74.6                    | 1.51             |
| Sodium hydroxide      | 40.0             | 50          | 19.1               | 52.4                    | 1.53             |

**HCl, 1 M**

Mix in the following order:

914.1 ml H<sub>2</sub>O

85.9 ml concentrated HCl

**KCl, 1 M**

74.6 g KCl

H<sub>2</sub>O to 1 liter

**MgCl<sub>2</sub>, 1 M**

20.3 g MgCl<sub>2</sub>·6H<sub>2</sub>O

H<sub>2</sub>O to 100 ml

**MgSO<sub>4</sub>, 1 M**

24.6 g MgSO<sub>4</sub>·7H<sub>2</sub>O

H<sub>2</sub>O to 100 ml

**NaCl, 5 M**

292 g NaCl

H<sub>2</sub>O to 1 liter

**NaOH, 10 M**

Mix in the following order:

476 ml H<sub>2</sub>O

524 ml 50% (v/v) NaOH

Alternatively:

Dissolve 400 g NaOH in 450 ml H<sub>2</sub>O

Add H<sub>2</sub>O to 1 liter

**Phenol, buffered**

8-hydroxyquinoline

Liquefied phenol, redistilled

50 mM Tris base (unadjusted pH ~10.5)

50 mM Tris·Cl, pH 8.0 (see recipe)

TE buffer, pH 8.0 (see recipe)

Add 0.5 g of 8-hydroxyquinoline to a 2-liter glass beaker containing a stir bar. Gently pour in 500 ml of liquefied phenol or melted crystals of redistilled phenol (melted in a water bath at 65°C). The phenol will turn yellow due to the 8-hydroxyquinoline, which is added as an antioxidant. Add 500 ml of 50 mM Tris base. Cover the beaker with aluminum foil and stir 10 min at low speed with magnetic stirrer at room temperature. Let phases separate at room temperature. Gently decant the top (aqueous) phase into a suitable waste receptacle. Remove what cannot be decanted with a 25-ml glass pipet and a suction bulb. Add 500 ml of 50 mM Tris·Cl, pH 8.0. Repeat equilibration with 500 ml of 50 mM Tris·Cl, pH 8.0, twice. The pH of the phenol phase can be checked with indicator paper and should be 8.0. If it is not, repeat equilibration until this pH is obtained. Add 250 ml of 50 mM Tris·Cl, pH 8.0, or TE buffer, pH 8.0, and store at 4°C in brown glass bottles or clear glass bottles wrapped in aluminum foil.

*Phenol prepared with 8-hydroxyquinoline as an antioxidant can be stored ≤2 months at 4°C.*

*Phenol must be redistilled before use, because oxidation products of phenol can damage and introduce breaks into nucleic acid chains. Redistilled phenol is commercially available. Regardless of the source, the phenol must be buffered before use.*

**CAUTION:** *Phenol can cause severe burns to skin and damage clothing. Gloves, safety glasses, and a lab coat should be worn whenever working with phenol, and all manipulations should be carried out in a fume hood. A glass receptacle should be available exclusively for disposing of used phenol and chloroform.*

**Table A.2E.2** Preparation of 0.1 M Sodium and Potassium Acetate Buffers<sup>a</sup>

| Desired pH | Solution A (ml) | Solution B (ml) |
|------------|-----------------|-----------------|
| 3.6        | 46.3            | 3.7             |
| 3.8        | 44.0            | 6.0             |
| 4.0        | 41.0            | 9.0             |
| 4.2        | 36.8            | 13.2            |
| 4.4        | 30.5            | 19.5            |
| 4.6        | 25.5            | 24.5            |
| 4.8        | 20.0            | 30.0            |
| 5.0        | 14.8            | 35.2            |
| 5.2        | 10.5            | 39.5            |
| 5.4        | 8.8             | 41.2            |
| 5.6        | 4.8             | 45.2            |

<sup>a</sup>Adapted by permission from CRC, 1975.**Table A.2E.3** Preparation of 0.1 M Sodium and Potassium Phosphate Buffers<sup>a</sup>

| Desired pH | Solution A (ml) | Solution B (ml) | Desired pH | Solution A (ml) | Solution B (ml) |
|------------|-----------------|-----------------|------------|-----------------|-----------------|
| 5.7        | 93.5            | 6.5             | 6.9        | 45.0            | 55.0            |
| 5.8        | 92.0            | 8.0             | 7.0        | 39.0            | 61.0            |
| 5.9        | 90.0            | 10.0            | 7.1        | 33.0            | 67.0            |
| 6.0        | 87.7            | 12.3            | 7.2        | 28.0            | 72.0            |
| 6.1        | 85.0            | 15.0            | 7.3        | 23.0            | 77.0            |
| 6.2        | 81.5            | 18.5            | 7.4        | 19.0            | 81.0            |
| 6.3        | 77.5            | 22.5            | 7.5        | 16.0            | 84.0            |
| 6.4        | 73.5            | 26.5            | 7.6        | 13.0            | 87.0            |
| 6.5        | 68.5            | 31.5            | 7.7        | 10.5            | 90.5            |
| 6.6        | 62.5            | 37.5            | 7.8        | 8.5             | 91.5            |
| 6.7        | 56.5            | 43.5            | 7.9        | 7.0             | 93.0            |
| 6.8        | 51.0            | 49.0            | 8.0        | 5.3             | 94.7            |

<sup>a</sup>Adapted by permission from CRC, 1975.**Phosphate-buffered saline (PBS)***10× stock solution, 1 liter:*

80 g NaCl

2 g KCl

11.5 g Na<sub>2</sub>HPO<sub>4</sub>·7H<sub>2</sub>O2 g KH<sub>2</sub>PO<sub>4</sub>*Working solution, pH ~7.3:*

137 mM NaCl

2.7 mM KCl

4.3 mM Na<sub>2</sub>HPO<sub>4</sub>·7H<sub>2</sub>O1.4 mM KH<sub>2</sub>PO<sub>4</sub>**Potassium acetate buffer, 0.1 M***Solution A:* 11.55 ml glacial acetic acid/liter (0.2 M)*Solution B:* 19.6 g potassium acetate (KC<sub>2</sub>H<sub>3</sub>O<sub>2</sub>)/liter (0.2 M)Referring to Table A.2E.2 for desired pH, mix the indicated volumes of solutions A and B, then dilute with H<sub>2</sub>O to 100 ml.*This may be made as a 5- or 10-fold concentrate by scaling up the amount of potassium acetate in the same volume. Acetate buffers show concentration-dependent pH changes, so check concentrate pH by diluting an aliquot to the final concentration.**To prepare buffers with pH intermediate between the points listed in Table A.2E.2, prepare closest higher pH, then titrate with solution A.*

**Potassium phosphate buffer, 0.1 M**

*Solution A:* 27.2 g  $\text{KH}_2\text{PO}_4$  per liter (0.2 M)

*Solution B:* 45.6 g  $\text{K}_2\text{HPO}_4 \cdot 3\text{H}_2\text{O}$  per liter (0.2 M)

Referring to Table A.2E.3 for desired pH, mix the indicated volumes of solutions A and B, then dilute with  $\text{H}_2\text{O}$  to 200 ml.

*This may be made as a 5- or 10-fold concentrate by scaling up the amount of potassium phosphate in the same volume. Phosphate buffers show concentration-dependent pH changes, so check concentrate pH by diluting an aliquot to the final concentration.*

**SDS, 20%**

Dissolve 20 g SDS (sodium dodecyl sulfate or sodium lauryl sulfate) in  $\text{H}_2\text{O}$  to 100 ml total with stirring (it may be necessary to heat the solution slightly to fully dissolve the powder). Filter sterilize using a 0.45- $\mu\text{m}$  filter.

**Sodium acetate, 3 M**

Dissolve 408 g sodium acetate  $\cdot 3\text{H}_2\text{O}$  in 800 ml  $\text{H}_2\text{O}$

Add  $\text{H}_2\text{O}$  to 1 liter

Adjust pH to 4.8 or 5.2 (as desired) with 3 M acetic acid

**Sodium acetate buffer, 0.1 M**

*Solution A:* 11.55 ml glacial acetic acid/liter (0.2 M)

*Solution B:* 27.2 g sodium acetate ( $\text{NaC}_2\text{H}_3\text{O}_2 \cdot 3\text{H}_2\text{O}$ )/liter (0.2 M)

Referring to Table A.2E.2 for desired pH, mix the indicated volumes of solutions A and B, then dilute with  $\text{H}_2\text{O}$  to 100 ml. (See Potassium acetate buffer recipe for further details.)

**Sodium phosphate buffer, 0.1 M**

*Solution A:* 27.6 g  $\text{NaH}_2\text{PO}_4 \cdot \text{H}_2\text{O}$  per liter (0.2 M)

*Solution B:* 53.65 g  $\text{Na}_2\text{HPO}_4 \cdot 7\text{H}_2\text{O}$  per liter (0.2 M)

Referring to Table A.2E.3 for desired pH, mix the indicated volumes of solutions A and B, then dilute with  $\text{H}_2\text{O}$  to 200 ml. (See Potassium phosphate buffer recipe for further details.)

**SSC (sodium chloride/sodium citrate), 20 $\times$** 

3 M NaCl (175 g/liter)

0.3 M  $\text{Na}_3\text{citrate} \cdot 2\text{H}_2\text{O}$  (88 g/liter)

Adjust pH to 7.0 with 1 M HCl

**TAE (Tris/acetate/EDTA) electrophoresis buffer**

*50 $\times$  stock solution:*

242 g Tris base

57.1 ml glacial acetic acid

37.2 g  $\text{Na}_2\text{EDTA} \cdot 2\text{H}_2\text{O}$

$\text{H}_2\text{O}$  to 1 liter

*Working solution, pH ~8.5:*

40 mM Tris acetate

2 mM  $\text{Na}_2\text{EDTA} \cdot 2\text{H}_2\text{O}$

**TBE (Tris/borate/EDTA) electrophoresis buffer**

*10 $\times$  stock solution, 1 liter:*

108 g Tris base (890 mM)

55 g boric acid (890 mM)

40 ml 0.5 M EDTA, pH 8.0 (see recipe; 20 mM)

**TE buffer**

10 mM Tris-Cl, pH 7.4, 7.5, or 8.0 (or other pH; see recipe)

1 mM EDTA, pH 8.0

***Tris·Cl [tris(hydroxymethyl)aminomethane], 1 M***

Dissolve 121 g Tris base in 800 ml H<sub>2</sub>O

Adjust to desired pH with concentrated HCl

Mix and add H<sub>2</sub>O to 1 liter

*NOTE: The pH of Tris buffers changes significantly with temperature, decreasing approximately 0.028 pH units per 1°C. Tris-buffered solutions should be adjusted to the desired pH at the temperature at which they will be used. Because the pK<sub>a</sub> of Tris is 8.08, Tris should not be used as a buffer below pH ~7.2 or above pH ~9.0.*

**LITERATURE CITED**

Chemical Rubber Company. 1975. CRC Handbook of Biochemistry and Molecular Biology, Physical and Chemical Data, 3rd ed., Vol. 1. CRC Press, Boca Raton, Fla.
